# Supplementary figures and images for: Retracted Article: Dynamic Adsorption Self-assembly of Au nanocube (NC) for opposite charge Au nanoparticles (NPs) in real time
Source: Royal Society of Chemistry journal article supplement (doi:10.1039/c9cc08080e), 2020-01-01

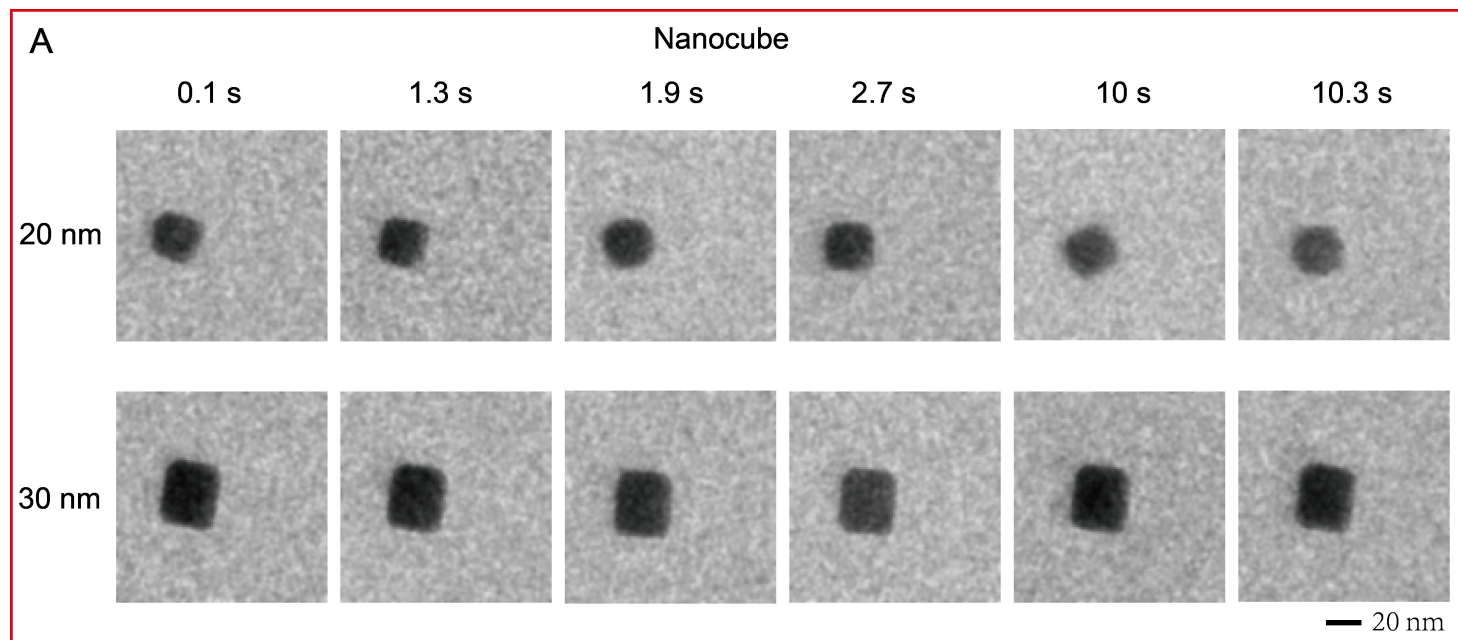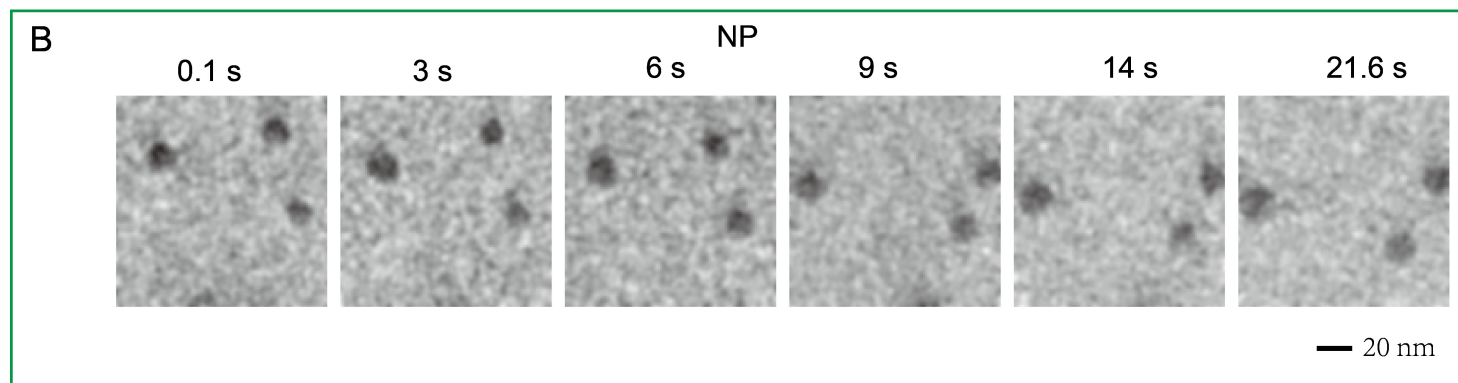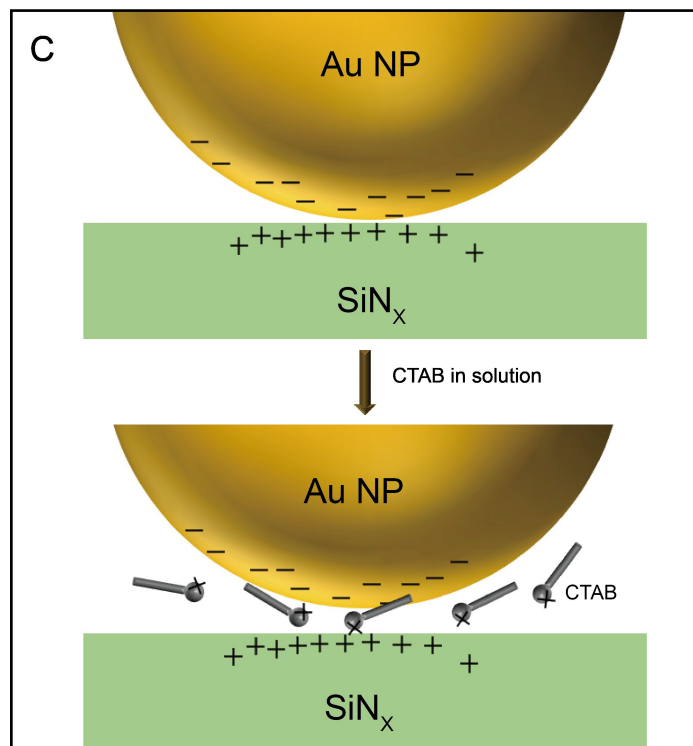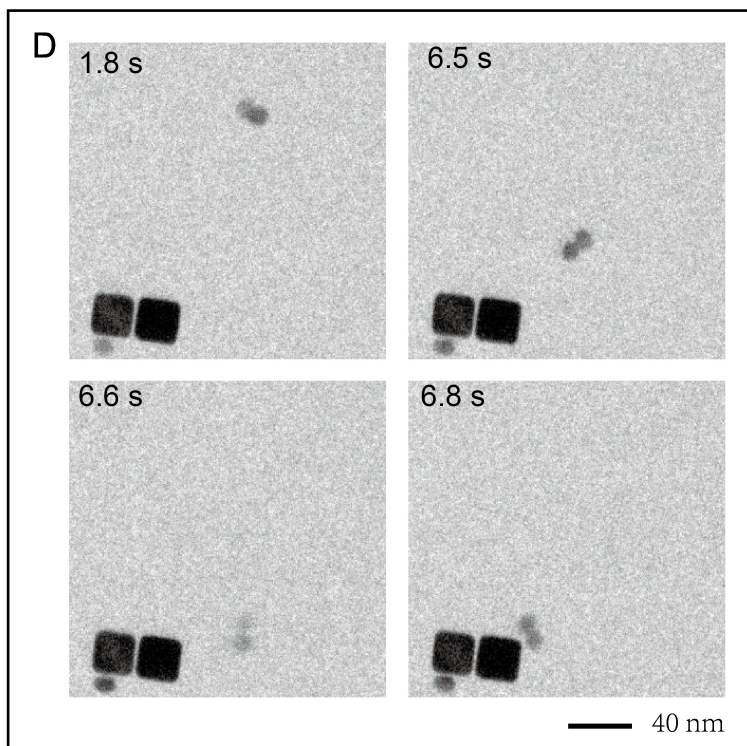

Supplement: c9cc08080e3.pdf [file c9cc08080e3.pdf]
